# Supplementary material
Source: Springer Nature journal article supplement (https://www.springermedizin.de/resource/supplementary/12911_2006_141_MOESM7_ESM.pdf/9527216)
Supplement: MOESM7 [file 9527216]

191212121212

status: create

2003-12-15+01:00

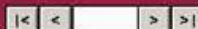[Admin](#)[Operationsmetod](#)[Operationsförlopp](#)[PAD](#)[Visa alla](#)**Admin**

Operatör

Operationsdatum

Op.start kl.  tim:min

Utskrivningsdag  dag

Utskrivningstid  tim:min

**Operationsmetod**

Ablation

Endometriesupprimerande förbehandling

Anestesiform

Uteruscavitet

Ablationsmetod

**Operationsförlopp**

Operationslängd  min

Vätskeåtgång  L

Vätskedeficit  ml

Preparatvikt  g

Op.komplikation, typ

Utförd operation
